# Supplementary material
Source: PubMed Central journal article supplement (PMC4375033)
Supplement: NIHMS629941-supplement-supplement_1.pdf [file NIHMS629941-supplement-supplement_1.pdf]

**Supplementary Table 1** Volatile Organic Compounds in Patients with stones in the Bile duct and Primary Sclerosing Cholangitis

| <b>Volatile organic compounds</b> | <b>Primary Sclerosing Cholangitis<br/>Median (Interquartile range),<br/>ppb</b> | <b>Benign<br/>Stones in CBD<br/>Median (Interquartile range),<br/>ppb</b> |
|-----------------------------------|---------------------------------------------------------------------------------|---------------------------------------------------------------------------|
| Acetaldehyde                      | 223.8(71-921)                                                                   | 239(107.8-286.9)                                                          |
| Acetone                           | 862.3(519.1-1990)                                                               | 660.8(203.3-1096.6)                                                       |
| Acrylonitrile                     | 1.12(0.6-2.43)                                                                  | 0.9(0.6-1.1)                                                              |
| Benzene                           | 10.9(3.2-223)                                                                   | 12.6(8.1-14.1)                                                            |
| carbon disulfide                  | 18.1(6.7-282)                                                                   | 13.8(8.1-17.4)                                                            |
| Ethanol                           | 299(183.4-501)                                                                  | 288.6(147.9-305)                                                          |
| Pentane                           | 62.1(26.5-213)                                                                  | 61.7(22-86.7)                                                             |
| 1-decene                          | 3.9(0.07-5.1)                                                                   | 5.6(3.2-6.7)                                                              |
| 1-heptene                         | 6.3(0.09-19.3)                                                                  | 11.1(9.2-19.3)                                                            |
| 1-nonene                          | 5.3(2.4-8.8)                                                                    | 4.4(3.6-9.3)                                                              |
| 1-octene                          | 10(0.5-13.8)                                                                    | 11.5(10.4-18.1)                                                           |
| 3-methylhexane                    | 18.9(1.7-33.1)                                                                  | 23.7(15.3-40.3)                                                           |
| Ammonia                           | 90.4(63.6-145)                                                                  | 65.7(59-70.7)                                                             |
| Ethane                            | 105.5(97.9-133)                                                                 | 91.2(69.4-101.5)                                                          |
| hydrogen sulfide                  | 0.3(0.3-0.5)                                                                    | 0.3(0.2-0.5)                                                              |
| triethyl amine                    | 2(0.9-9.8)                                                                      | 1(0.7-1.7)                                                                |
| trimethyl amine                   | 35.2(13.6-69.7)                                                                 | 35.1(15.1-42)                                                             |
